# Supplementary material
Source: MDPI journal article supplement (https://www.mdpi.com/2073-4441/14/4/561)
Supplement: s1 [file s1]

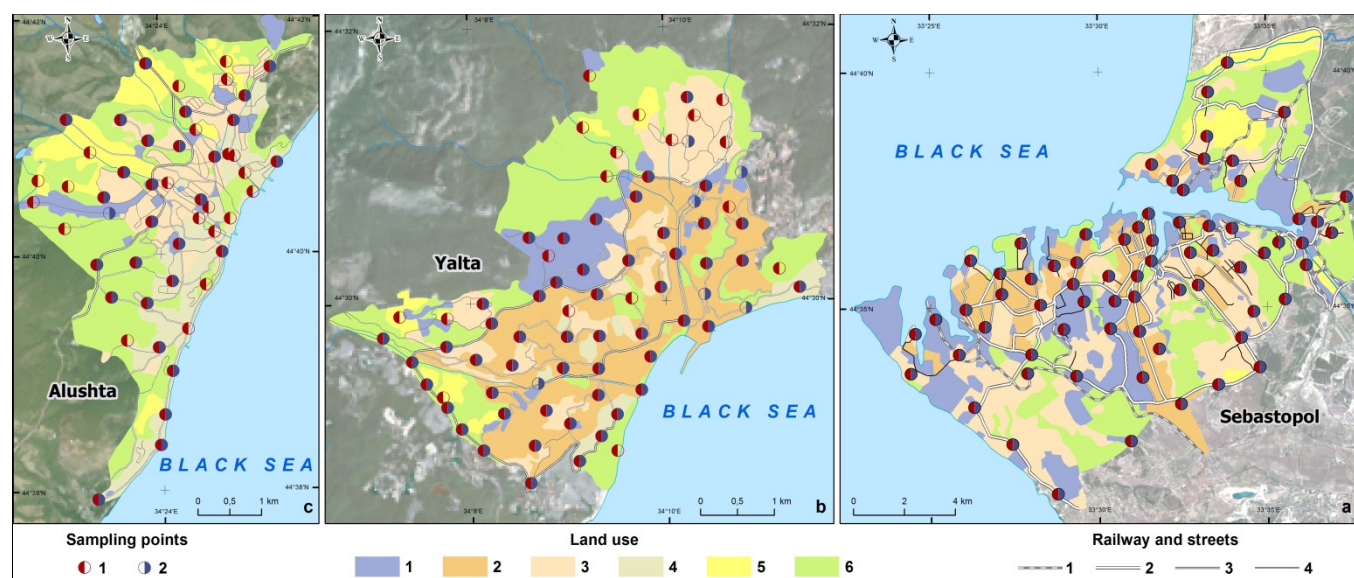

**Figure S1.** Points of urban soils and road dust sampling within the territory of Alushta, Yalta and Sebastopol. **Sampling points:** 1 – urban soils, 2 – road dust. **Land use zones:** 1 – industrial, 2 – residential with multi-storey buildings, 3 – residential with low-rise buildings, 4 – residential and recreational, 5 – agrogenic, 6 – recreational. Railway (1) and streets with: 1 – large roads, 2 – medium roads, 3 – small roads.

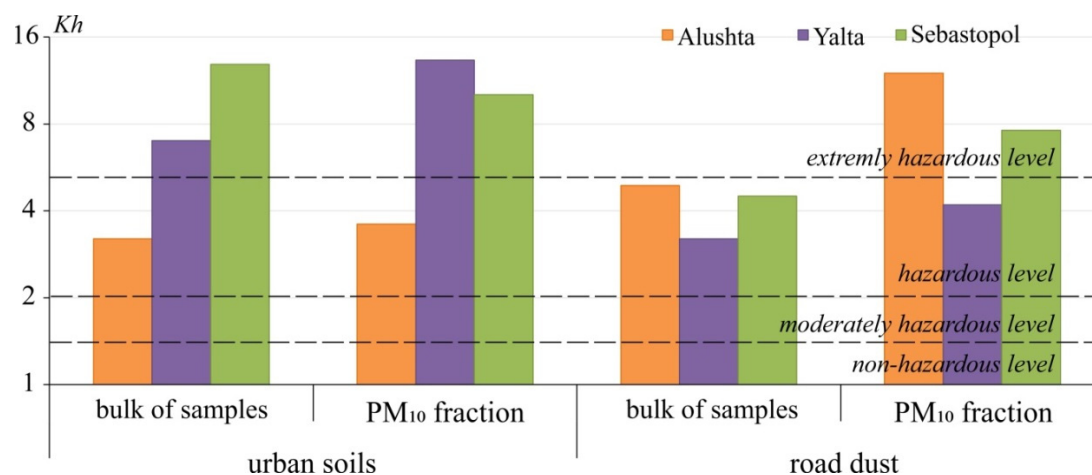

**Figure S2.**  $K_h$  coefficients and levels of environmental hazard of BaP contamination of urban soils, road dust and their PM<sub>10</sub> fractions in Alushta, Yalta and Sebastopol.

**Table S1.** Physicochemical properties of background soils, urban soils and road dust in Alushta, Yalta and Sebastopol.

| Object<br>(number of samples) | PM <sub>i</sub> , %   |             | PM <sub>1-10</sub> , % |             | PM <sub>10-50</sub> , % |             | PM <sub>&gt;50</sub> , % |             | pH                    |             | EC, µS / cm            |             | C <sub>org</sub> , %  |             |
|-------------------------------|-----------------------|-------------|------------------------|-------------|-------------------------|-------------|--------------------------|-------------|-----------------------|-------------|------------------------|-------------|-----------------------|-------------|
|                               | <u>mean</u>           | <i>Cv</i> , | <u>mean</u>            | <i>Cv</i> , | <u>mean</u>             | <i>Cv</i> , | <u>mean</u>              | <i>Cv</i> , | <u>mean</u>           | <i>Cv</i> , | <u>mean</u>            | <i>Cv</i> , | <u>mean</u>           | <i>Cv</i> , |
|                               | min–max               | %           | min–max                | %           | min–max                 | %           | min–max                  | %           | min–max               | %           | min–max                | %           | min–max               | %           |
| <i>Background soils</i>       |                       |             |                        |             |                         |             |                          |             |                       |             |                        |             |                       |             |
| Cambisols (10)                | <u>5.0</u><br>2.8–7.6 | 31          | <u>34</u><br>27–43     | 16          | <u>20</u><br>9.3–34     | 34          | <u>41</u><br>17–53       | 28          | <u>6.7</u><br>6.2–7.6 | 8.0         | <u>103</u><br>27–220   | 79          | <u>2.1</u><br>1.2–4.0 | 50          |
| Haplic Kastanozem (10)        | <u>14</u><br>11–19    | 18          | <u>50</u><br>47–57     | 5.9         | <u>31</u><br>24–40      | 16          | <u>5.0</u><br>0.1–14     | 86          | <u>7.1</u><br>6.0–7.7 | 6.6         | <u>157</u><br>45–225   | 31          | <u>1.7</u><br>0.8–2.3 | 26          |
| <i>Alushta</i>                |                       |             |                        |             |                         |             |                          |             |                       |             |                        |             |                       |             |
| Urban soils (49)              | <u>4.0</u><br>1.1–14  | 63          | <u>26</u><br>9–52      | 35          | <u>24</u><br>10–39      | 29          | <u>46</u><br>2.8–77      | 36          | <u>7.6</u><br>6.0–8.2 | 5.0         | <u>320</u><br>56–1341  | 88          | <u>4.0</u><br>0.7–16  | 66          |
| Road dust (29)                | <u>3.0</u><br>1.0–4.8 | 38          | <u>19</u><br>6.2–30    | 38          | <u>14</u><br>3.8–36     | 56          | <u>64</u><br>45–84       | 16          | <u>7.5</u><br>7.1–8.2 | 3.0         | <u>283</u><br>104–1479 | 97          | <u>1.8</u><br>0.7–3.5 | 47          |
| <i>Yalta</i>                  |                       |             |                        |             |                         |             |                          |             |                       |             |                        |             |                       |             |
| Urban soils (69)              | <u>5.0</u><br>1.4–12  | 47          | <u>31</u><br>13–51     | 30          | <u>33</u><br>7.4–48     | 24          | <u>31</u><br>16–65       | 52          | <u>8.4</u><br>7.3–9.3 | 4.8         | <u>542</u><br>84–5150  | 150         | <u>3.8</u><br>0.7–11  | 63          |
| Road dust (57)                | <u>5.0</u><br>2.5–11  | 38          | <u>29</u><br>16–54     | 34          | <u>18</u><br>6.5–44     | 55          | <u>48</u><br>13–69       | 38          | <u>8.9</u><br>8.0–11  | 7.7         | <u>315</u><br>119–1148 | 54          | <u>1.7</u><br>0.2–4.9 | 61          |
| <i>Sebastopol</i>             |                       |             |                        |             |                         |             |                          |             |                       |             |                        |             |                       |             |
| Urban soils (69)              | <u>6.0</u><br>2.6–13  | 39          | <u>32</u><br>17–52     | 27          | <u>33</u><br>14–45      | 18          | <u>29</u><br>1.2–59      | 52          | <u>8.4</u><br>7.9–9.0 | 2.6         | <u>315</u><br>119–762  | 50          | <u>2.8</u><br>0.5–5.5 | 38          |
| Road dust (70)                | <u>6.0</u><br>2.8–9.3 | 25          | <u>26</u><br>13–47     | 25          | <u>13</u><br>6.7–23     | 28          | <u>55</u><br>29–72       | 16          | <u>8.7</u><br>7.8–9.8 | 4.2         | <u>279</u><br>117–764  | 54          | <u>1.5</u><br>0.6–3.3 | 42          |
